# Supplementary material for: Biochemical Characterization of a Structure-Specific Resolving Enzyme from Sulfolobus islandicus Rod-Shaped Virus 2
Source: PLOS journal article supplement (doi:10.1371/journal.pone.0023668), 2011-08-17

A

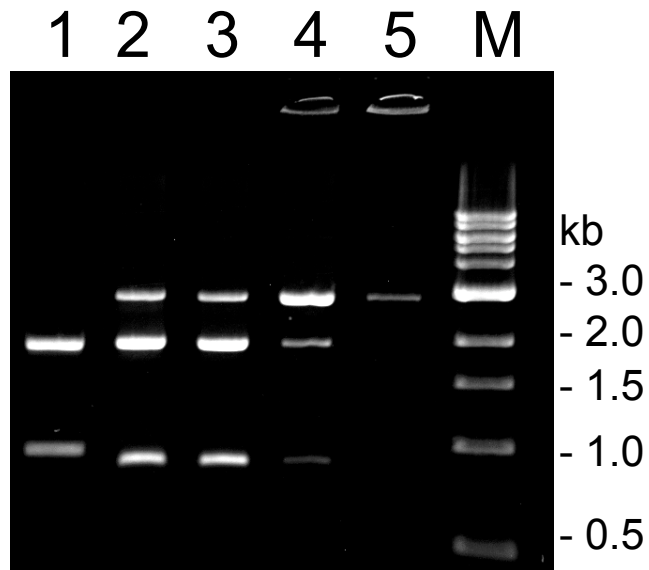

B

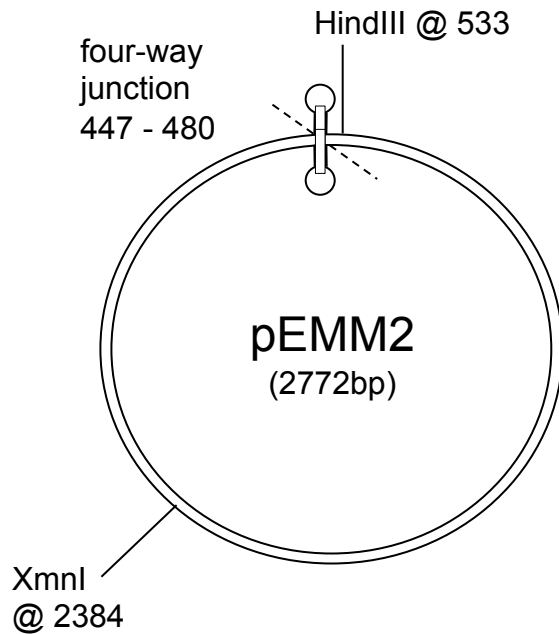

Supplement: S2 (10.1371/journal.pone.0023668.s002) [file journal.pone.0023668.s002]
